# Supplementary material
Source: MDPI journal article supplement (https://www.mdpi.com/2073-4395/12/5/1225)
Supplement: s1 [file s1]

**Introgression of resistance to multiple pathotypes of *Plasmodiophora brassicae* from turnip (*Brassica rapa* ssp. *rapifera*) into spring *B. napus* canola**

Kawalpreet Kaur, Yingyi Liu, Habibur Rahman\*

Department of Agricultural, Food and Nutritional Science, University of Alberta, Edmonton, AB, T6G 2P5, Canada.

\*Correspondence: Habibur Rahman, Department of Agricultural, Food and Nutritional Science, University of Alberta, Edmonton, AB, T6G 2P5, Canada.

\*Email: [habibur.rahman@ualberta.ca](mailto:habibur.rahman@ualberta.ca)

Number of pages = 5

Number of Supplemental Figures = 2

Number of Supplemental Tables = 2

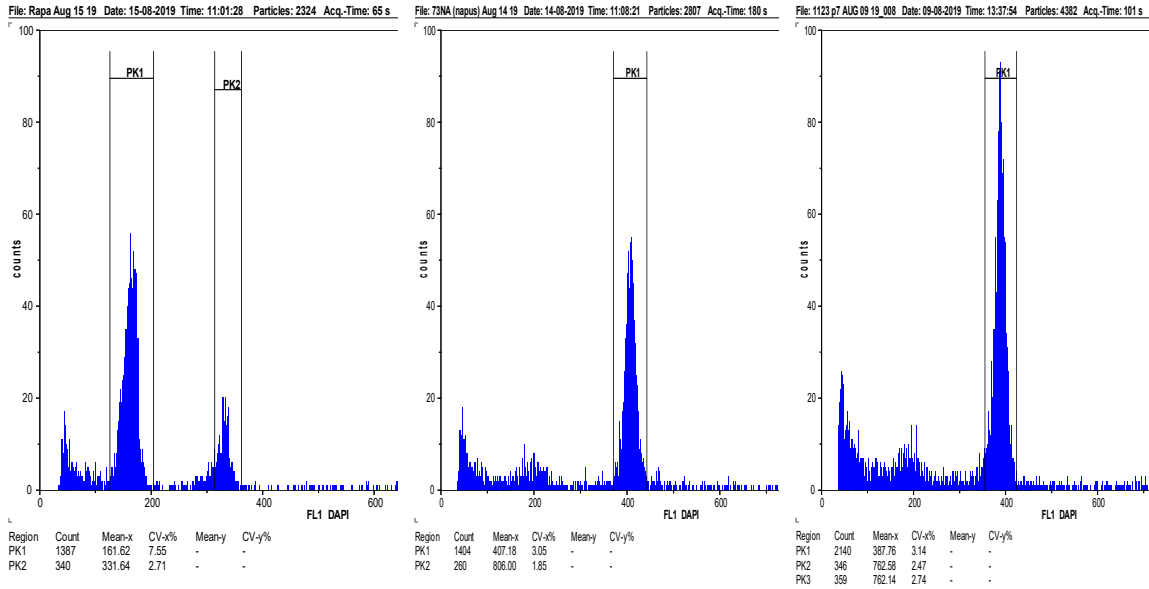

**Figure S1.** DNA histogram showing relative nuclear DNA content in the *Brassica rapa* and *B. napus* parents and in a representative BC<sub>1</sub>F<sub>6</sub> plant. The X-axis shows relative quantity of DNA in a cell and the Y-axis shows the number of cells counted.

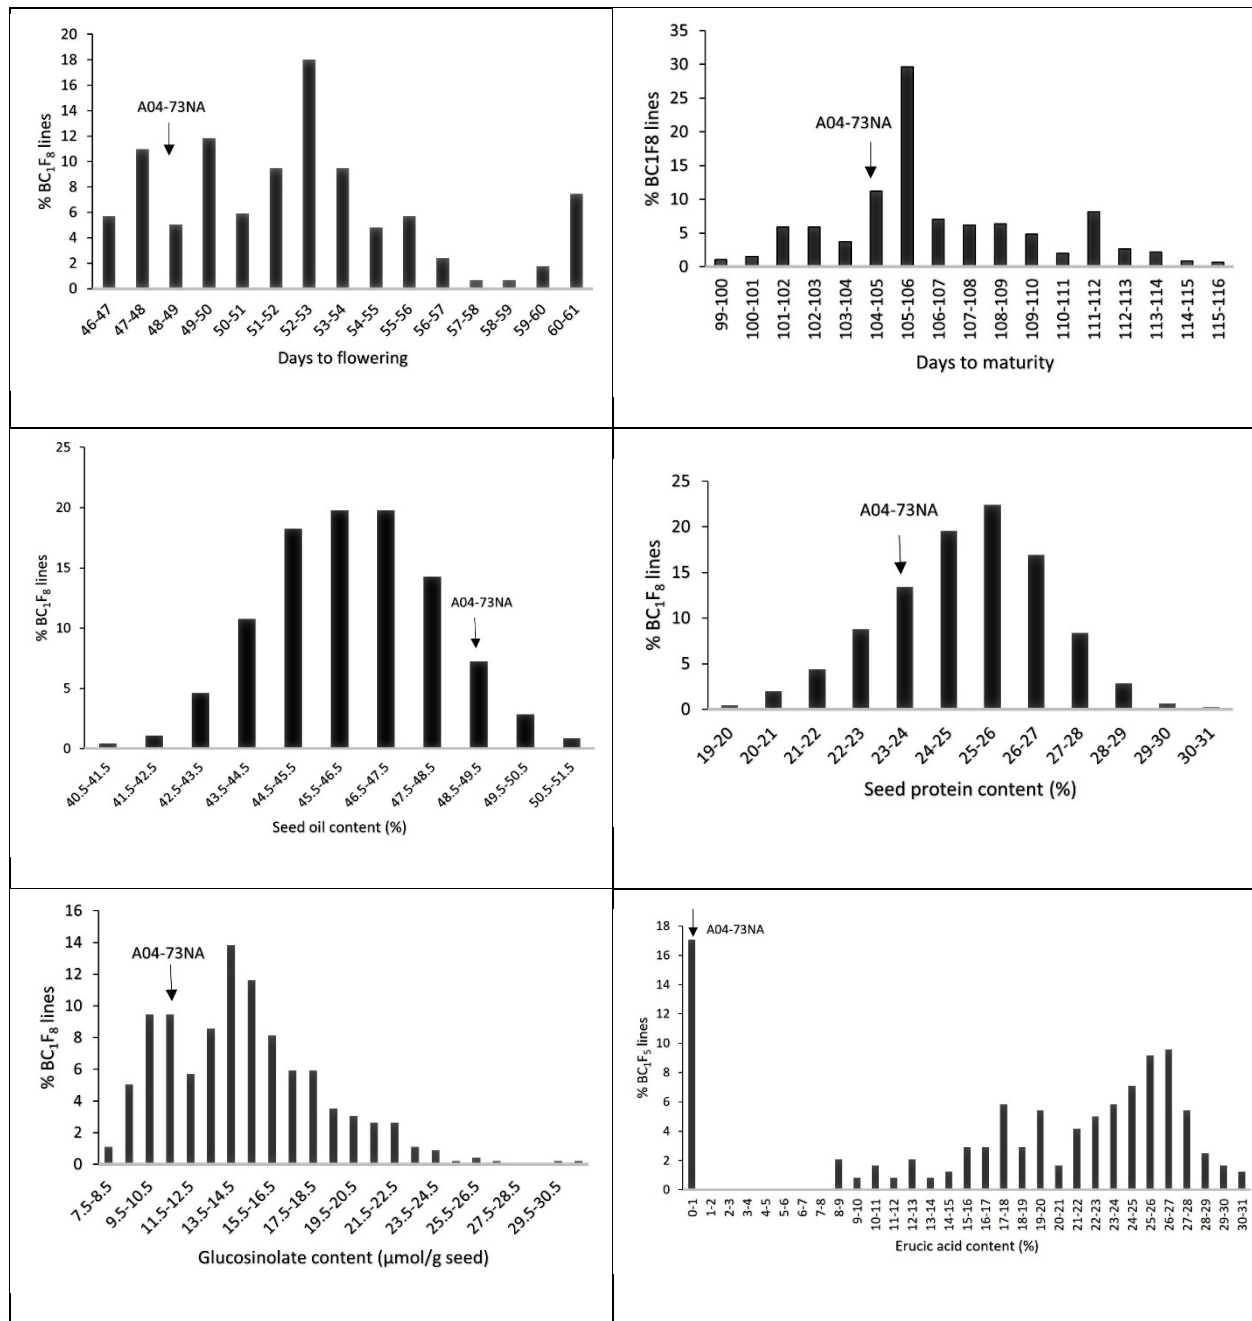

**Figure S2.** Distribution of the BC<sub>1</sub>F<sub>8</sub> lines of (*Brassica napus* × *B. rapa*) × *B. napus* interspecific cross, grown in nursery plots in 2020, for days to flowering ( $n = 452$  lines), days to maturity ( $n = 452$ ), and seed oil ( $n = 450$ ), protein ( $n = 450$ ), and glucosinolate ( $n = 450$ ) contents. Erucic acid content in seed oil of the BC<sub>1</sub>F<sub>5</sub> plants ( $n = 240$ ) grown in greenhouse also presented. The value for the *B. napus* parent A04-73NA are indicated by vertical arrow.

**Table S1.** Performance of the BC<sub>1</sub>F<sub>8</sub> lines ( $n = 450-452$ ; see Figure S2) derived from (*B. napus* × *B. rapa*) × *B. napus* interspecific cross and their spring *B. napus* parent A04-73NA tested in nursery plots in 2020, and the BC<sub>1</sub>F<sub>9</sub> lines ( $n = 112$ ) and an open-pollinated cultivar UA CountyGold tested in replicated field trials in 2021 for different agronomic and seed quality traits.

**a. BC<sub>1</sub>F<sub>8</sub> lines tested in 2020**

| Population                     | Seed yield  |            | Days to flowering |            | Days to maturity       |             |
|--------------------------------|-------------|------------|-------------------|------------|------------------------|-------------|
|                                | Range       | Mean ± SE  | Range             | Mean ± SE  | Range                  | Mean ± SE   |
| BC <sub>1</sub> F <sub>8</sub> | -           | -          | 46 - 60           | 51.0 ± 0.2 | 99 - 115               | 105.8 ± 0.2 |
| A04-73NA                       | -           | -          | 46 - 49           | 48.0 ± 0.2 | 100 - 111              | 103.8 ± 0.6 |
|                                | Oil (%)     |            | Protein (%)       |            | Glucosinolate (μmol/g) |             |
| BC <sub>1</sub> F <sub>8</sub> | 40.6 - 51.5 | 46.2 ± 0.1 | 19.2 - 30.0       | 24.9 ± 0.1 | 7.8 - 31.2             | 14.4 ± 0.6  |
| A04-73NA                       | 45.3 - 51.2 | 48.7 ± 0.3 | 21.2 - 26.6       | 23.4 ± 0.3 | 10.2 - 14.2            | 12.0 ± 0.2  |

**b. BC<sub>1</sub>F<sub>9</sub> lines tested in 2021**

|                                | Seed yield               |             | Days to flowering |            | Days to maturity       |            |
|--------------------------------|--------------------------|-------------|-------------------|------------|------------------------|------------|
|                                |                          |             |                   |            |                        |            |
| BC <sub>1</sub> F <sub>9</sub> | 1008 - 3626              | 1749 ± 17.8 | 42 - 55           | 48.7 ± 0.2 | 86 - 113               | 96.8 ± 0.2 |
| UA CountyGold                  | 1033 - 2634              | 1744 ± 93.9 | 47 - 53           | 49.0 ± 0.6 | 91 - 113               | 97.0 ± 1.5 |
|                                | Oil (%)                  |             | Protein (%)       |            | Glucosinolate (μmol/g) |            |
| BC <sub>1</sub> F <sub>9</sub> | 40.8 - 46.6              | 42.7 ± 0.1  | 27.1 - 31.8       | 30.2 ± 0.1 | 13.8 - 28.9            | 18.4 ± 0.6 |
| UA CountyGold                  | 43.1 - 46.8              | 44.8 ± 0.3  | 28.1 - 31.5       | 30.1 ± 0.3 | 15.2 - 22.3            | 18.3 ± 0.6 |
|                                | Saturated fatty acid (%) |             |                   |            |                        |            |
| BC <sub>1</sub> F <sub>9</sub> | 5.96 - 6.71              | 6.18 ± 0.03 |                   |            |                        |            |
| UA CountyGold                  | 6.28 - 6.30              | 6.30 ± 0.01 |                   |            |                        |            |

**Table S2.** Analysis of variance for agronomic and seed quality traits of the BC<sub>1</sub>F<sub>9</sub> lines derived from (*B. napus* × *B. rapa*) × *B. napus* interspecific cross. Data from three trials conducted in 2021 were used in analysis.

| Source                | Seed yield  |        |         |                | Days to flowering |       |         |                              | Days to maturity      |       |         |                |
|-----------------------|-------------|--------|---------|----------------|-------------------|-------|---------|------------------------------|-----------------------|-------|---------|----------------|
|                       | <i>df</i>   | MS     | F value | <i>p</i> value | <i>df</i>         | MS    | F value | <i>P</i> value <sup>††</sup> | <i>df</i>             | MS    | F value | <i>p</i> value |
| Genotype <sup>†</sup> | 112         | 408096 | 4.07    | <0.0001***     | 112               | 38.36 | 45.05   | <0.0001***                   | 112                   | 19.36 | 8.3     | <0.0001***     |
| Location <sup>‡</sup> | 2           | 71488  | 0.71    | 0.98           | 2                 | 3.72  | 4.36    | 0.027*                       | 2                     | 2.46  | 1.05    | 0.70           |
| G × L <sup>§</sup>    | 224         | 104300 | 1.04    | 0.76           | 224               | 1.52  | 1.78    | <0.0001***                   | 224                   | 2.22  | 0.95    | 0.701          |
|                       | Oil content |        |         |                | Protein content   |       |         |                              | Glucosinolate content |       |         |                |
|                       | <i>df</i>   | MS     | F value | <i>p</i> value | <i>df</i>         | MS    | F value | <i>P</i> value <sup>††</sup> | <i>df</i>             | MS    | F value | <i>p</i> value |
| Genotype <sup>†</sup> | 44          | 3.44   | 4.15    | <0.0001***     | 44                | 1.24  | 1.29    | 0.11                         | 44                    | 50.66 | 26.79   | <0.0001***     |
| Location <sup>‡</sup> | 2           | 2.92   | 3.54    | 0.06           | 2                 | 0.17  | 0.18    | 0.33                         | 2                     | 35.11 | 18.78   | <0.0001***     |
| G × L <sup>§</sup>    | 88          | 0.75   | 0.91    | 0.48           | 88                | 0.52  | 0.54    | 0.000009***                  | 88                    | 3.46  | 1.83    | 0.000007***    |

<sup>†</sup> The field lines developed from (*B. napus* × *B. rapa*) × *B. napus* interspecific cross.

<sup>‡</sup> Three different locations (Michener, West-240 and St. Albert research farms).

<sup>§</sup> Combination of the genotype and location.

<sup>††</sup> \* and \*\*\* = *p* < 0.05 and 0.001, respectively.
